# Supplementary material for: Rational design and microwave-assisted synthesis of a novel terthiophene derivative for facile preparation of binder-free polymer/metal oxide-based binary composite electrodes with high electrochemical performance
Source: Royal Society of Chemistry journal article supplement (doi:10.1039/d2nj00357k), 2022-01-01
Supplement: d2nj00357k1.pdf [file d2nj00357k1.pdf]

# NEW JOURNAL OF CHEMISTRY

## Supporting Information

**Rational design and microwave-assisted synthesis of a novel  
terthiophene derivative for facile preparation of binder-free  
polymer/metal oxide-based binary composite electrodes with high  
electrochemical performance**

Deniz Yiğit<sup>a</sup> and Mustafa Güllü<sup>b</sup>

*Asst. Prof. D. Yiğit and Prof. Dr. M. Güllü*

<sup>a</sup> *Department of Basic Pharmaceutical Sciences, Faculty of Pharmacy, Lokman Hekim University, Söğütözü, 06510, Ankara, Turkey*

<sup>b</sup> *Department of Chemistry, Faculty of Science, Ankara University, Beşevler, 06100, Ankara, Turkey*

## Contents

- *Synthetic procedure for ethyl 2-cyano-3-(2,5-dibromothiophene-3-yl)acrylate (5)*
- *Fig. S1.  $^1\text{H}$  NMR and  $^{13}\text{C}$  NMR spectra of ethyl 2-cyano-3-(2,5-dibromothiophene-3-yl)acrylate (5)*
- *Synthetic procedure for ethyl 3-[(2,2':5',2''-terthiophene-3'-yl)]-2-cyanoacrylate (7)*
- *Fig. S2.  $^1\text{H}$  NMR and  $^{13}\text{C}$  NMR spectra of ethyl 3-[(2,2':5',2''-terthiophene-3'-yl)]-2-cyanoacrylate (7)*
- *Synthetic procedure for 3-[(2,2':5',2''-terthiophen-3'-yl)]-2-cyanoacrylic acid (PSDOGA)*
- *Fig. S3.  $^1\text{H}$  NMR and  $^{13}\text{C}$  NMR spectra of 3-[(2,2':5',2''-terthiophen-3'-yl)]-2-cyanoacrylic acid (PSDOGA)*
- *Fig. S4. Schematic fabrication procedure of the binder-free binary composite electrode material*
- *Fig. S5. Schematic representation for the assembly procedure of solid-state symmetrical type supercapacitor device*
- *Fig. S6. XRD patterns of (a) PSDOGA/TiO<sub>2</sub> and (b) PSDOGA/V<sub>2</sub>O<sub>5</sub> binder-free binary composite materials*
- *Fig. S7. SEM-EDX elemental mapping images of (a) PSDOGA/TiO<sub>2</sub> composite electrode before cycling, (b) PSDOGA/TiO<sub>2</sub> composite electrode after 12 500 charge/discharge cycles, (c) PSDOGA/V<sub>2</sub>O<sub>5</sub> composite electrode before cycling and (d) PSDOGA/V<sub>2</sub>O<sub>5</sub> composite electrode after 12 500 charge/discharge cycles*

❖ **Synthesis of ethyl 2-cyano-3-(2,5-dibromothiophene-3-yl)acrylate (5)**

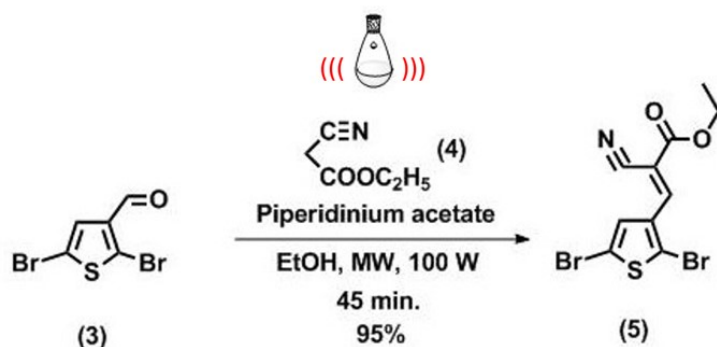

**General procedure:** Piperidine (0.07 g, 0.85 mmol) was dissolved in 10 mL ethanol and placed in a microwave reaction vessel (30 mL). Piperidinium acetate was prepared by adding acetic acid (0.035 g, 0.55 mmol) dropwise to the piperazine solution. Then, 2,5-dibromo-3-thiophenecarboxaldehyde (3 g, 11.1 mmol) (3) and ethyl cyanoacetate (1.25 g, 11.1 mmol) (4) were added to the piperidinium acetate solution. The reaction mixture was irradiated at 80°C under 100 W single-mode microwave power for 45 min. After the completion reaction, precipitated light yellow solid product was filtered and washed with cold ethanol (20 mL). The crude product was crystallized from hexane. Ethyl 2-cyano-3-(2,5-dibromothiophene-3-yl)acrylate (5) was obtained as a light yellow solid (3.85 g, 10.5 mmol, 95%, mp 126-128°C). <sup>1</sup>H NMR (400 MHz, CDCl<sub>3</sub>) δH/ppm: 1.39 (t, J=7.2 Hz, 3H, ester -CH<sub>3</sub>), 4.38 (q, J=6.8 Hz, 2H, ester -CH<sub>2</sub>-), 8 ppm (s, 1H, Th-H), 8.15 (t, 1H, -CH=C-). <sup>13</sup>C NMR (400 MHz, CDCl<sub>3</sub>) δC/ppm: 14 (ester -CH<sub>3</sub>), 62.9 (ester -CH<sub>2</sub>-), 103.4 (-CH=C-), 113.9 (Th-2C), 114.9 (Th-5C), 124.9 (-CN), 128.1 (Th-4C), 134 (Th-3C), 143.8 (-CH=C-), 162.1 (ester -C=O). (EI) m/z (%) calcd for C<sub>10</sub>H<sub>7</sub>Br<sub>2</sub>NO<sub>2</sub>S: 365; found: 364.9 (M<sup>+</sup>, 20), 319.8 (10), 286 (5), 257.9 (100), 229.9 (30), 212.9 (15), 172.9 (3), 160 (10), 132 (15), 106.1 (5), 88.1 (10), 69.1 (5). FTIR (ATR) ν<sub>max</sub>/cm<sup>-1</sup> 3104 (w, aromatic C-H stretching), 2984, 2906 (w, aliphatic C-H stretching), 2226 (m, -CN stretching), 1724 (s, ester -C=O stretching), 1642, 1604, 1506 (m, aromatic -C=C- stretching), 1402, 1376 (m, aliphatic C-H bending), 1252 (s, -C-O- stretching), 758 (s, thiophene-Br stretching).

DY-2BrThCN  
 Sample Name:  
 DY-2BrThCN  
 Data Collected on:  
 mercury400-mercury400  
 Archive directory:  
 /home/vnmr1/vnmrsys/data  
 Sample directory:  
 DY-2BrThCN\_20160714\_01  
 FidFile: PROTON\_02  
 Pulse Sequence: PROTON (s2pul)  
 Solvent: cdcl3  
 Data collected on: Jul 14 2016  
 Temp. 25.0 C / 298.1 K  
 Operator: vnmr1  
 Relax. delay 1.000 sec  
 Pulse 45.0 degrees  
 Acq. time 2.559 sec  
 Width 6402.0 Hz  
 8 repetitions  
 OBSERVE H1, 400.1740753 MHz  
 DATA PROCESSING  
 FT size 32768  
 Total time 0 min 31 sec

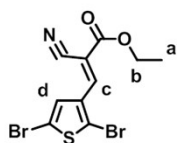

Agilent Technologies

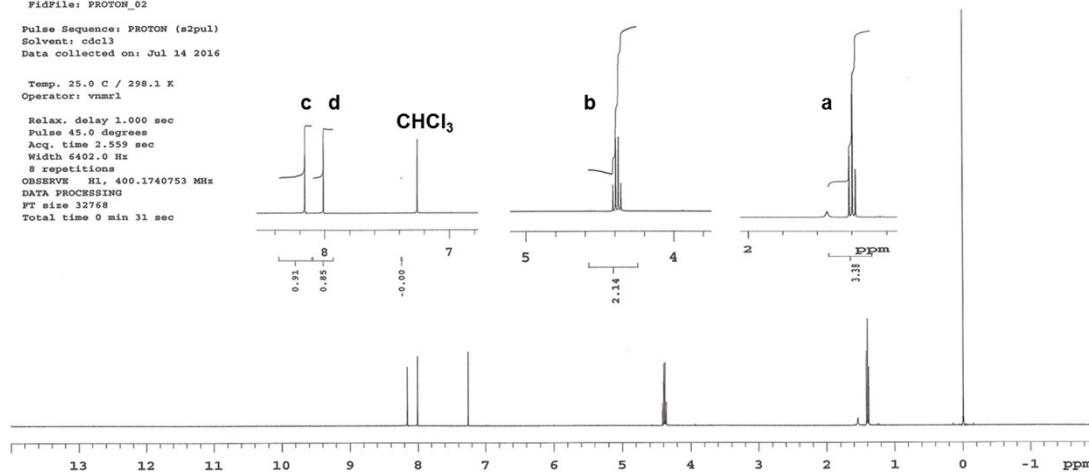

DY-2BrThCN  
 Sample Name:  
 DY-2BrThCN  
 Data Collected on:  
 mercury400-mercury400  
 Archive directory:  
 /home/vnmr1/vnmrsys/data  
 Sample directory:  
 DY-2BrThCN\_20160714\_01  
 FidFile: CARBON\_02  
 Pulse Sequence: CARBON (s2pul)  
 Solvent: cdcl3  
 Data collected on: Jul 14 2016  
 Temp. 25.0 C / 298.1 K  
 Operator: vnmr1  
 Relax. delay 1.000 sec  
 Pulse 45.0 degrees  
 Acq. time 1.304 sec  
 Width 25125.6 Hz  
 2000 repetitions  
 OBSERVE C13, 100.6238513 MHz  
 DECOUPLE H1, 400.1760547 MHz  
 Power 38 dB  
 continuously on  
 WALTZ-16 modulated  
 DATA PROCESSING  
 Line broadening 0.5 Hz  
 FT size 65536  
 Total time 1 hr, 20 min

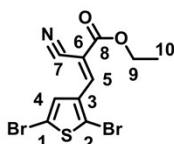

Agilent Technologies

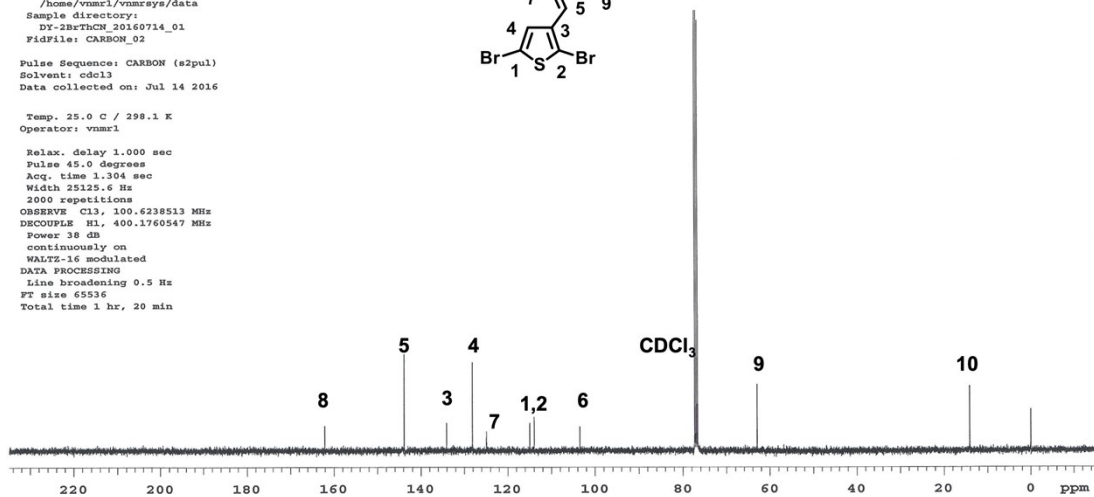

**Fig. S1.** <sup>1</sup>H NMR and <sup>13</sup>C NMR spectra of ethyl 2-cyano-3-(2,5-dibromothiophene-3-yl)acrylate (5)

❖ **Synthesis of ethyl 3-[(2,2':5',2''-terthiophene-3'-yl)]-2-cyanoacrylate (7)**

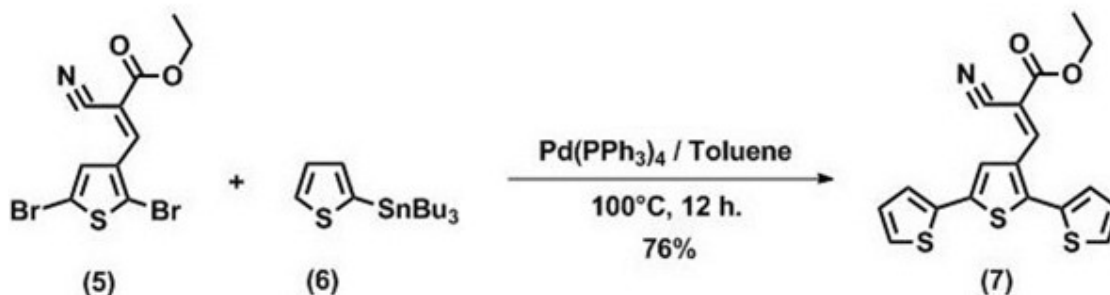

**General procedure:** In a 50 mL two-necked round-bottom flask fitted with a condenser and nitrogen inlet, ethyl 2-cyano-3-(2,5-dibromothiophene-3-yl)acrylate (0.5 g, 1.345 mmol) (5) and Pd(PPh<sub>3</sub>)<sub>4</sub> (0.04 g, 0.035 mmol, 0.025 eqv.) were dissolved in dry toluene (20 mL). The toluene solution was intensely stirred for 25 min and then, 2-(tributylstannyl)thiophene (1.25 g, 3.375 mmol, 2.5 eqv) (6) was added. The resulting reaction mixture was refluxed under a nitrogen atmosphere for 12 h. Following the completion of the reaction, toluene was removed under reduced pressure and the oily crude product was extracted with chloroform (3 x 25 mL), washed brine solution and dried over Na<sub>2</sub>SO<sub>4</sub>. After removal of chloroform by evaporation, the crude product was purified by column chromatography using hexane–ethyl acetate (4:1 v/v) as eluent. Ethyl 3-[(2,2':5',2''-terthiophene-3'-yl)]-2-cyanoacrylate (7) was obtained as a orange solid (0.38 g, 1.02 mmol, 76%, mp: 141-143°C). <sup>1</sup>H NMR (400 MHz, CDCl<sub>3</sub>) δH/ppm: 1.38 (t, J=7.6 Hz, 3H, ester –CH<sub>3</sub>), 4.37 (q, J=7.6 Hz, 2H, ester –CH<sub>2</sub>-), 7.06 (dd, J=8 Hz and J=3.6 Hz, 1H, Th-H), 7.19 (m, 2H, Th-H), 7.28 (d, J=4 Hz, 1H, Th-H), 7.31 (d, J=4 Hz, 1H, Th-H), 7.52 (dd, J=6 Hz and J=1.6 Hz, 1H, Th-H), 8.13 ppm (s, 1H, Th-H), 8.41 (t, 1H, -CH=C-). <sup>13</sup>C NMR (400 MHz, CDCl<sub>3</sub>) δC/ppm: 14.2 (ester –CH<sub>3</sub>), 62.6 (ester –CH<sub>2</sub>-), 101.8 (-CH=C-), 115.7 (-CN), 122.2 (Th-C), 125.2 (Th-C), 126 (Th-C), 128 (Th-C), 128.6 (Th-C), 129.1 (Th-C), 130.7 (Th-C), 132.8 (Th-C), 135.3 (Th-C), 137.6 (Th-C), 145.2 (Th-C), 146.3 (-CH=C-), 162.9 (ester –C=O). (EI) m/z (%) calcd for C<sub>18</sub>H<sub>13</sub>NO<sub>2</sub>S<sub>3</sub>: 371.4; found: 371 (M<sup>+</sup>, 100), 343 (5), 298 (98), 265 (20), 252 (5), 210 (3), 170 (2), 127 (5), 114 (2), 69 (3). FTIR (ATR) ν<sub>max</sub>/cm<sup>-1</sup> 3066 (w, aromatic C-H stretching), 2980 (w, aliphatic C–H stretching), 2218 (m, -CN stretching), 1716 (s, ester –C=O stretching), 1581, 1556 (m, aromatic –C=C- stretching), 1444, 1365 (m, aliphatic C-H bending), 1238, 1200 (m, -C-O- stretching).

DY-TTCN  
 Sample Name:  
 DY-TTCN  
 Data Collected on:  
 mercury400-mercury400  
 Archive directory:  
 /home/vnmr1/vnmrsys/data  
 Sample directory:  
 DY-TTCN\_20160421\_01  
 FidFile: PROTON\_02

Pulse Sequence: PROTON (s2pul)  
 Solvent: cdcl3  
 Data collected on: Apr 21 2016

Temp. 25.0 C / 298.1 K  
 Operator: vnmr1  
 Relax. delay 1.000 sec  
 Pulse 45.0 degrees  
 Acq. time 2.559 sec  
 Width 6402.0 Hz  
 16 repetitions  
 OBSERVE H1, 400.1740753 MHz  
 DATA PROCESSING  
 FT size 32768  
 Total time 1 min 0 sec

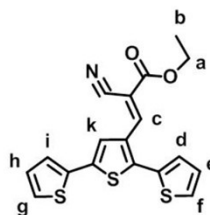

Agilent Technologies

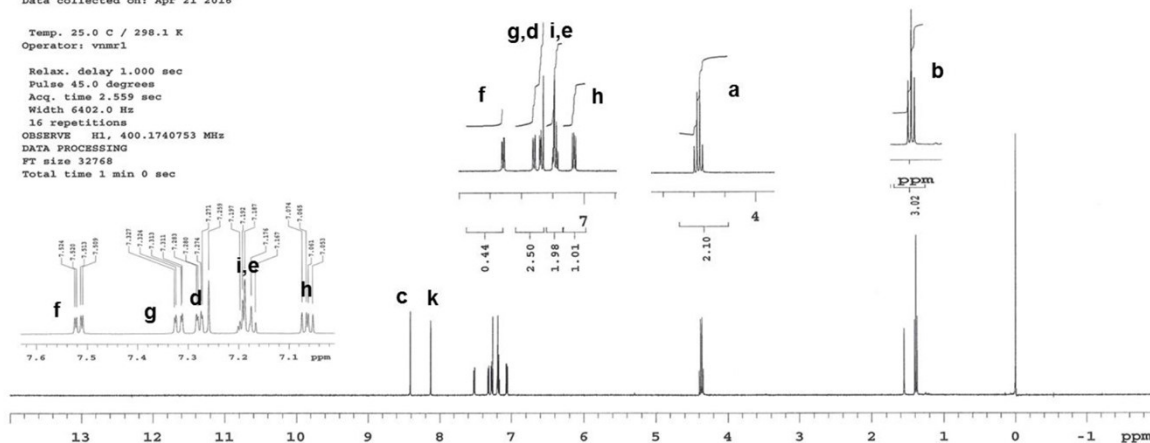

DY-TTCN  
 Sample Name:  
 DY-TTCN  
 Data Collected on:  
 mercury400-mercury400  
 Archive directory:  
 /home/vnmr1/vnmrsys/data  
 Sample directory:  
 DY-TTCN\_20160421\_01  
 FidFile: CARBON

Pulse Sequence: CARBON (s2pul)  
 Solvent: cdcl3  
 Data collected on: Apr 21 2016

Temp. 25.0 C / 298.1 K  
 Operator: vnmr1  
 Relax. delay 1.000 sec  
 Pulse 45.0 degrees  
 Acq. time 1.304 sec  
 Width 25125.6 Hz  
 1000 repetitions  
 OBSERVE C13, 100.6238513 MHz  
 DECOUPLE H1, 400.1760547 MHz  
 Power 38 dB  
 continuously on  
 WALTZ-16 modulated  
 DATA PROCESSING  
 Line broadening 0.5 Hz  
 FT size 65536  
 Total time 40 min

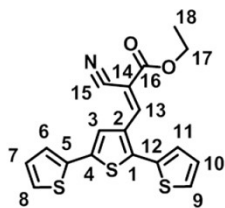

Agilent Technologies

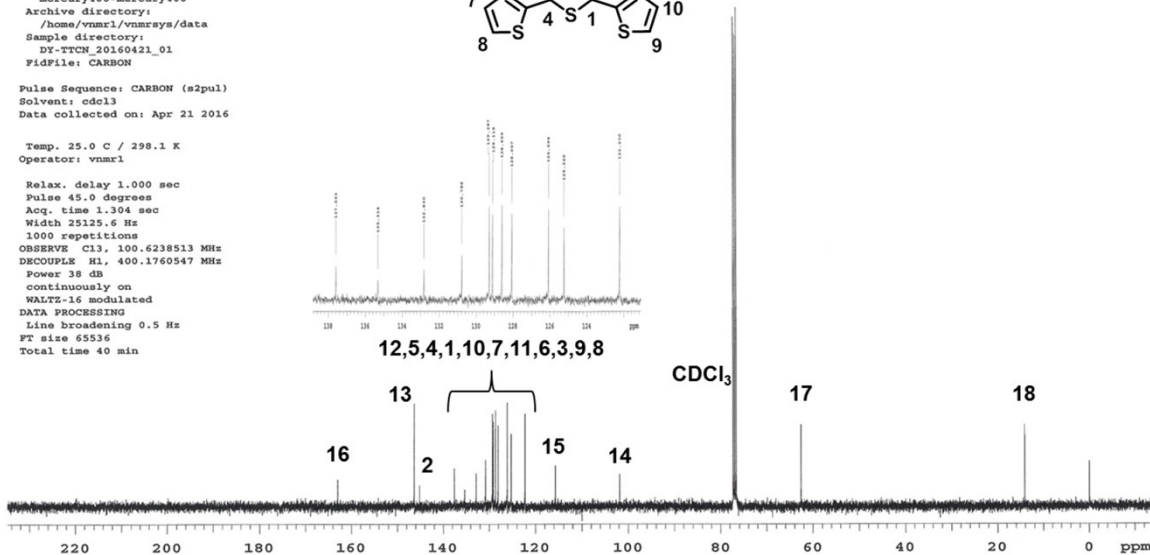

**Fig. S2.** <sup>1</sup>H NMR and <sup>13</sup>C NMR spectra ethyl 3-[(2,2':5',2''-terthiophene-3'-yl)]-2-cyanoacrylate (7)

❖ Synthesis of 3-[(2,2':5',2''-terthiophen-3'-yl)]-2-cyanoacrylic acid (SDOGA)

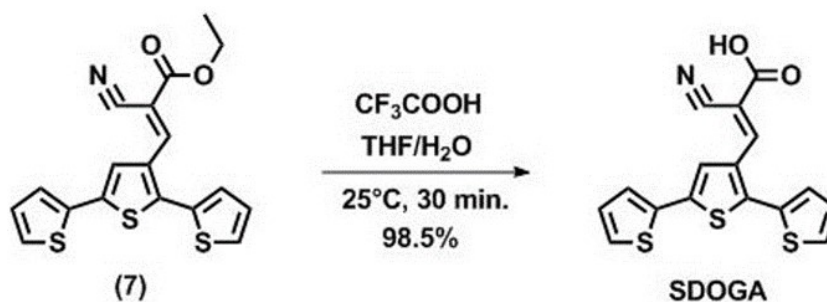

**General procedure:** In a 50 mL one-necked round-bottom flask, trifluoroacetic acid (4 mL) was added to the suspension of ethyl 3-[(2,2':5',2''-terthiophene-3'-yl)]-2-cyanoacrylate (1.25 g, 3.36 mmol) (7) in tetrahydrofuran/water (20 mL, 1:1, v/v). The orange suspension was stirred at room temperature for 30 min. The precipitated solid was filtered and washed with cool HCl solution several times. The crude product was recrystallized from ethanol to afford target monomer. 3-[(2,2':5',2''-terthiophen-3'-yl)]-2-cyanoacrylic acid (SDOGA) was obtained as a burgundy solid (1.13 g, 3.30 mmol, 98.5%, mp > 195°C). <sup>1</sup>H NMR (400 MHz, CDCl<sub>3</sub>) δ<sub>H</sub>/ppm: 7.13 (dd, *J*=8.4 Hz and *J*=3.6 Hz, 1H, Th-H), 7.28 (dd, *J*=8.2 Hz and *J*=3.6 Hz, 1H, Th-H), 7.37 (d, *J*= 3.6 Hz, 1H, Th-H), 7.63 (d, *J*= 4.4 Hz, 1H, Th-H), 7.87 (d, *J*= 4.4 Hz, 1H, Th-H), 7.98 ppm (s, 1H, Th-H), 8.2 (t, 1H, -CH=C-). <sup>13</sup>C NMR (400 MHz, CDCl<sub>3</sub>) δ<sub>C</sub>/ppm: 103.9 (-CH=C-), 116.2 (-CN), 121.7 (Th-C), 125.9 (Th-C), 127.3 (Th-C), 128.7 (Th-C), 129.1 (Th-C), 129.9 (Th-C), 130.3 (Th-C), 130.5 (Th-C), 131.9 (Th-C), 134.3 (Th-C), 136.6 (Th-C), 143.3 (Th-C), 144.6 (-CH=C-), 163.4 (carboxylic acid -C=O). (EI) *m/z* (%) calcd for C<sub>16</sub>H<sub>9</sub>NO<sub>2</sub>S<sub>3</sub>: 343.4; found: 343 (M<sup>+</sup>, 95), 297 (90), 264.4 (35), 251.6 (7), 209.7 (5), 170.1 (4), 126.9 (8), 113.2 (2), 68.6 (5). FTIR (ATR) ν<sub>max</sub>/cm<sup>-1</sup> 3100-2472 (w, b, carboxylic acid -OH stretching), 3101, 3070 (w, aromatic C-H stretching), 2218 (m, -CN stretching), 1672 (s, carboxylic acid -C=O stretching), 1554, 1502 (m, aromatic -C=C- stretching), 1273, 1242, 1224 (m, -C-O- stretching). Elemental analysis: anal. calcd for C<sub>16</sub>H<sub>9</sub>NO<sub>2</sub>S<sub>3</sub> (343.4): C 55.95 H 2.64 N 4.08; found: C 55.64 H 2.53 N 3.96.

DY-TTCOOH  
 Sample Name:  
 DY-TTCOOH  
 Data Collected on:  
 mercury400-mercury400  
 Archive directory:  
 /home/vnmr1/vnmrsys/data  
 Sample directory:  
 DY-TTCOOH\_20160422\_01  
 FidFile: PROTON\_02  
 Pulse Sequence: PROTON (s2pul)  
 Solvent: dmsd  
 Data collected on: Apr 22 2016

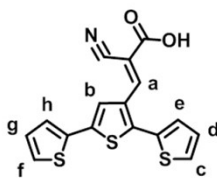

Agilent Technologies

Temp. 25.0 C / 298.1 K  
 Operator: vnmr1  
 Relax. delay 1.000 sec  
 Pulse 45.0 degrees  
 Acq. time 2.559 sec  
 Width 6402.0 Hz  
 8 repetitions  
 OBSERVE H1, 400.1759761 MHz  
 DATA PROCESSING  
 FT size 32768  
 Total time 0 min 31 sec

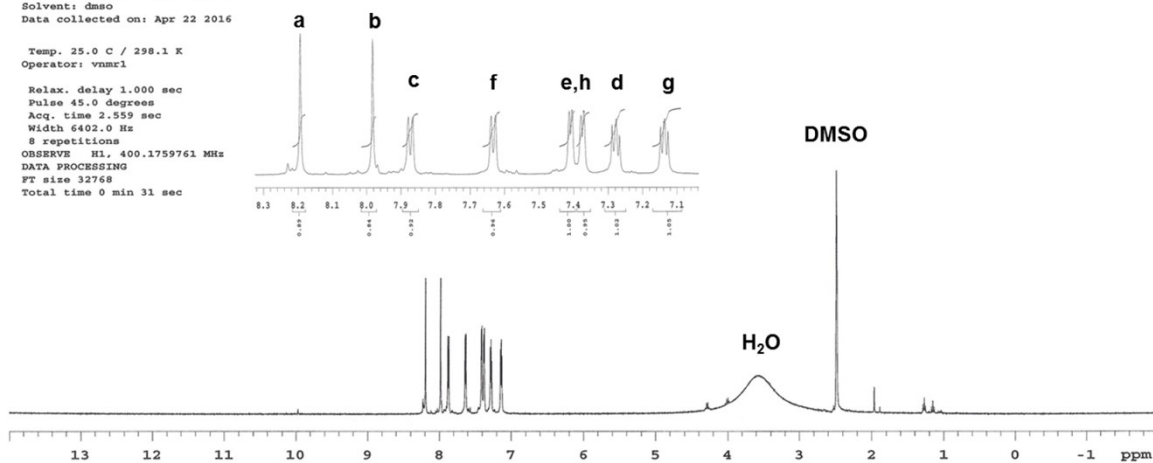

DY-TTCOOH  
 Sample Name:  
 DY-TTCOOH  
 Data Collected on:  
 mercury400-mercury400  
 Archive directory:  
 /home/vnmr1/vnmrsys/data  
 Sample directory:  
 DY-TTCOOH\_20160422\_01  
 FidFile: current  
 Pulse Sequence: CARBON (s2pul)  
 Solvent: dmsd  
 Data collected on: Apr 22 2016

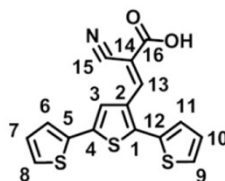

Agilent Technologies

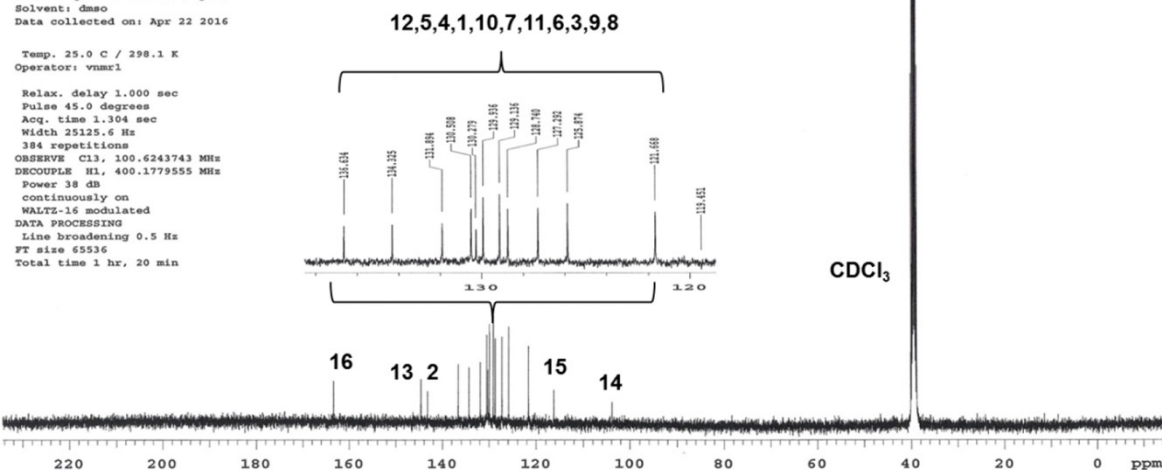

**Fig. S3.**  $^1\text{H}$  NMR and  $^{13}\text{C}$  NMR spectra of 3-[(2,2':5',2''-terthiophen-3'-yl)]-2-cyanoacrylic acid (SDOGA)



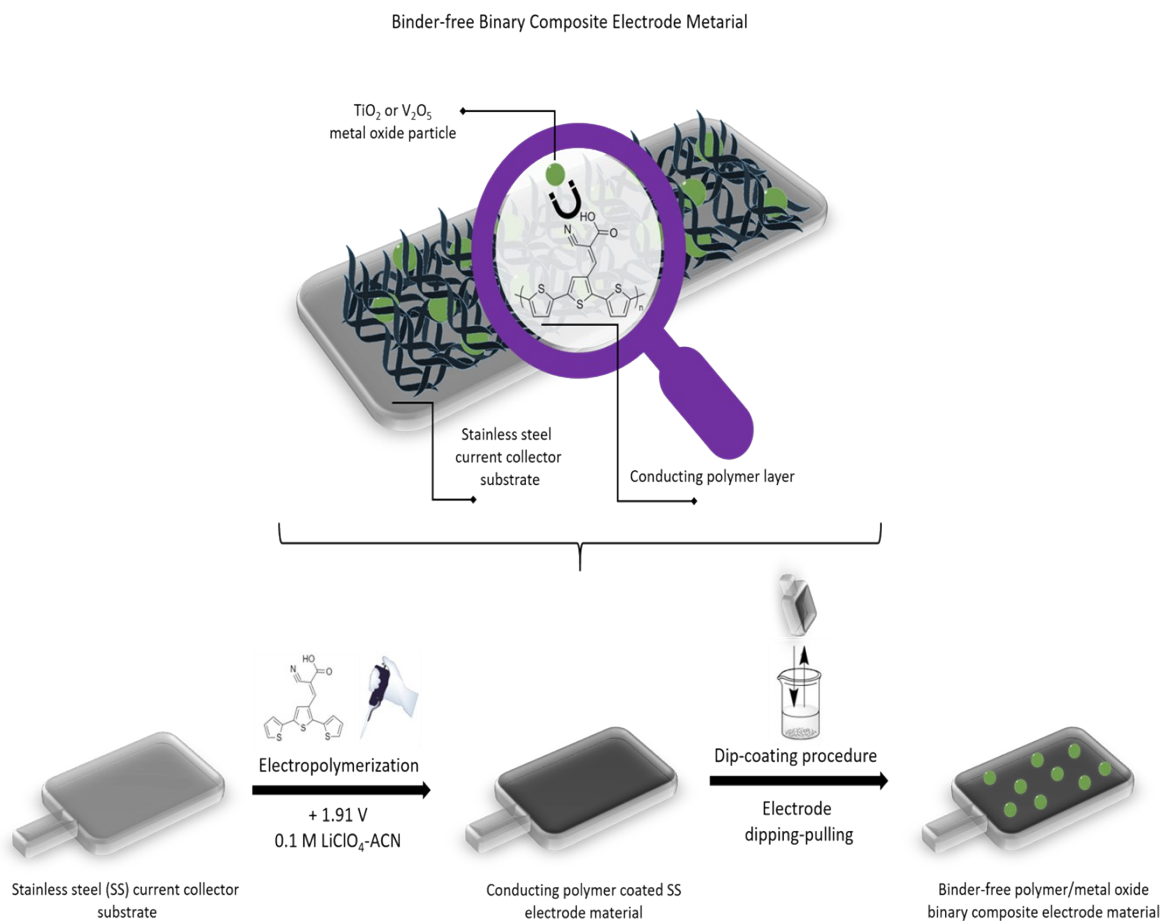

**Fig. S4.** Schematic fabrication procedure of the binder-free binary composite electrode material

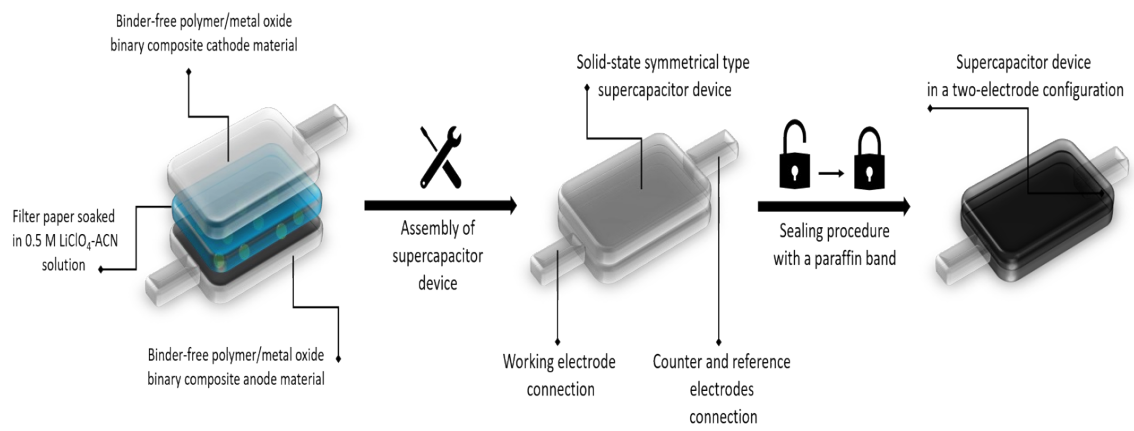

**Fig. S5.** Schematic representation for the assembly procedure of solid-state symmetrical type supercapacitor device

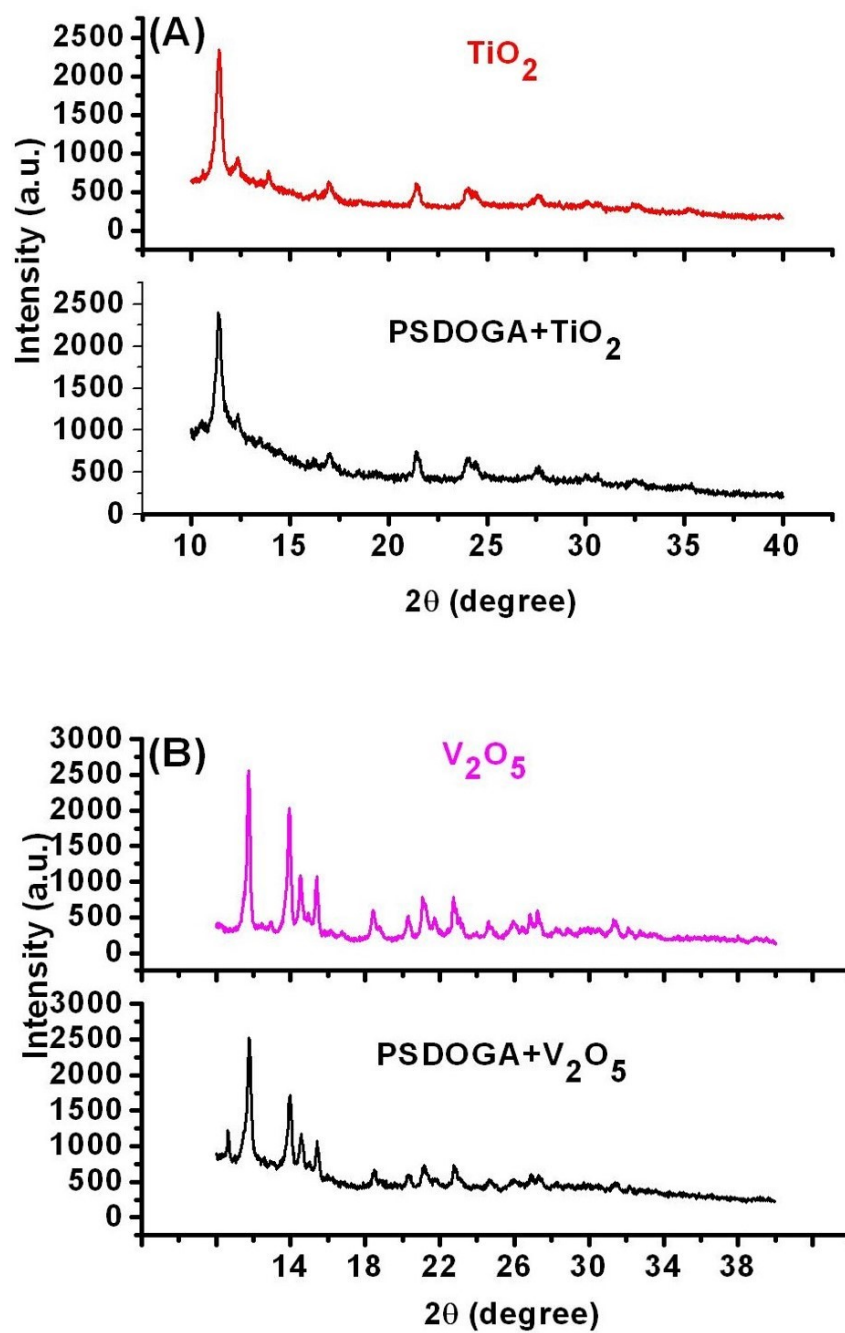

**Fig. S6.** XRD patterns of (a)  $\text{PSDOGA}/\text{TiO}_2$  and (b)  $\text{PSDOGA}/\text{V}_2\text{O}_5$  binder-free binary composite materials

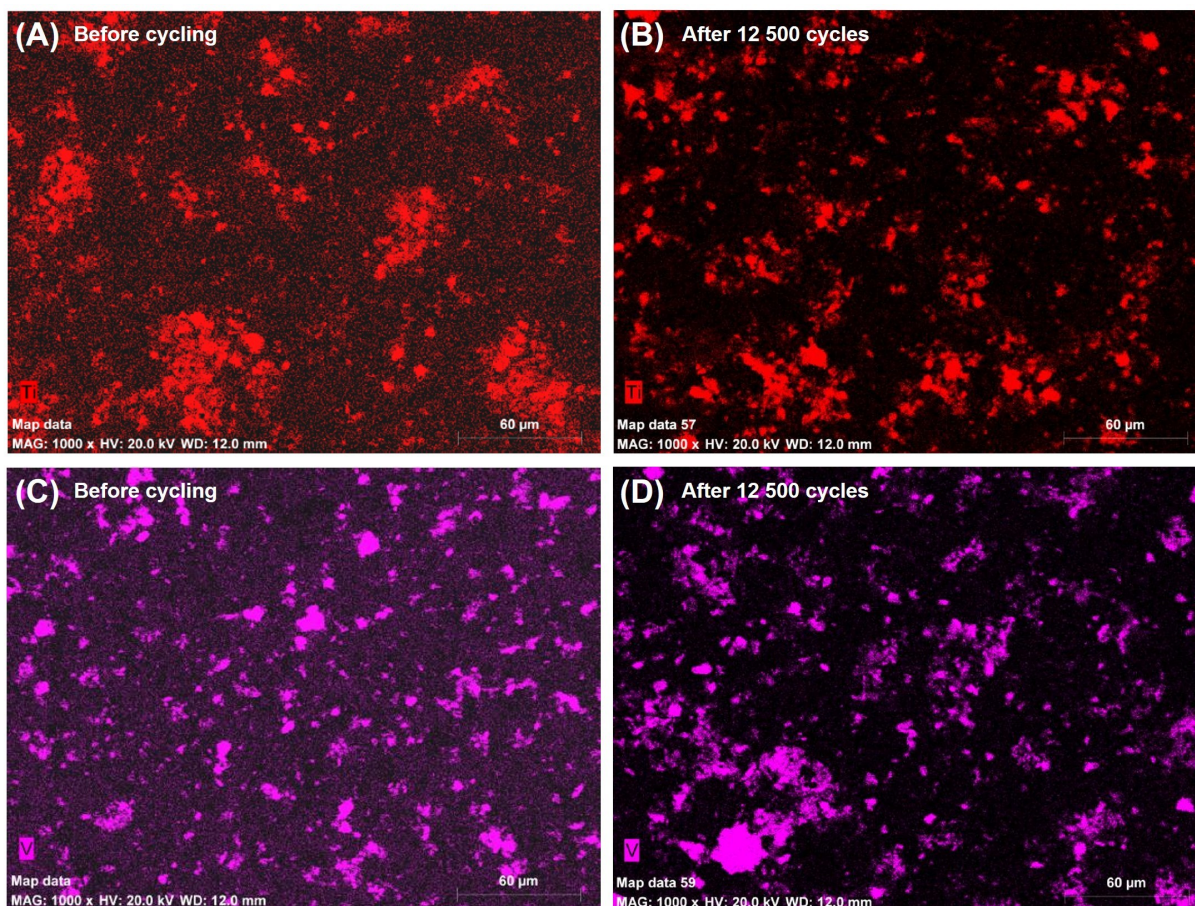

**Fig. S7.** SEM-EDX elemental mapping images of (a) PSDOGA/TiO<sub>2</sub> composite electrode before cycling, (b) PSDOGA/TiO<sub>2</sub> composite electrode after 12 500 charge/discharge cycles, (c) PSDOGA/V<sub>2</sub>O<sub>5</sub> composite electrode before cycling and (d) PSDOGA/V<sub>2</sub>O<sub>5</sub> composite electrode after 12 500 charge/discharge cycles
